# Supplementary material
Source: Royal Society of Chemistry journal article supplement (doi:10.1039/d6nj01263a)
Supplement: d6nj01263a1.pdf [file d6nj01263a1.pdf]

## Supporting Information

### Multiple hydrogen bonds endow single-component solvent-free adhesives with high flexibility and self-healing properties

Yulian Jiang<sup>a</sup>, Baoyu Wang<sup>b</sup>, Zhuoyu Yang<sup>b</sup>, Xiaolei Hou<sup>b</sup>, Xingyu Xu<sup>b\*</sup>, and Xiaoming Xie<sup>b\*</sup>

a. Department of Chinese, Xinzhou Normal University, Xinzhou, Shanxi 034000, China.

b. Department of Chemistry, Xinzhou Normal University, Xinzhou, Shanxi 034000, China.

Corresponding Author. E-mail: [xiexm0910@163.com](mailto:xiexm0910@163.com);

#### Characterization

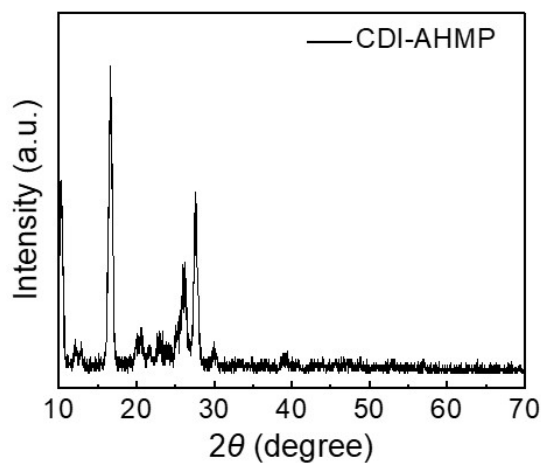

**Fig. S1** PXRD patterns of the CDI-AHMP.

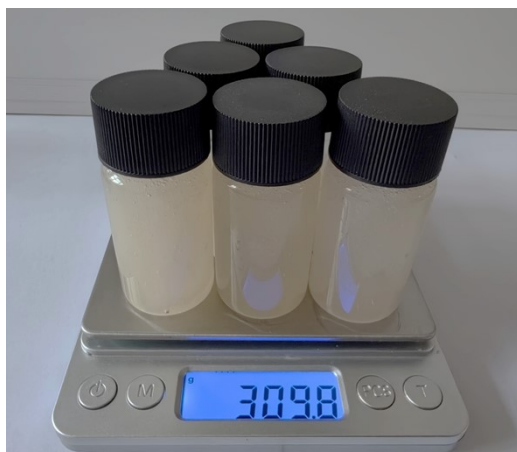

**Fig. S2** Macroscopic photograph of USSP<sub>400</sub> adhesive obtained in small batches.

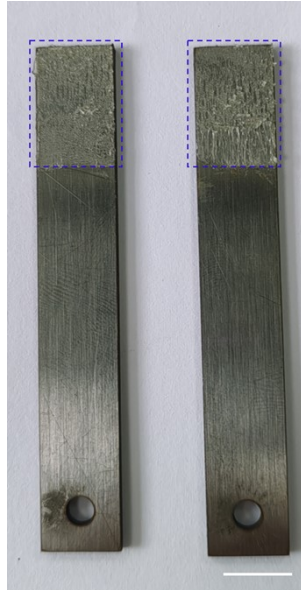

**Fig. S3** The distribution image of USSP<sub>400</sub> adhesive on SS substrate after detachment (scale bar, 1 cm).

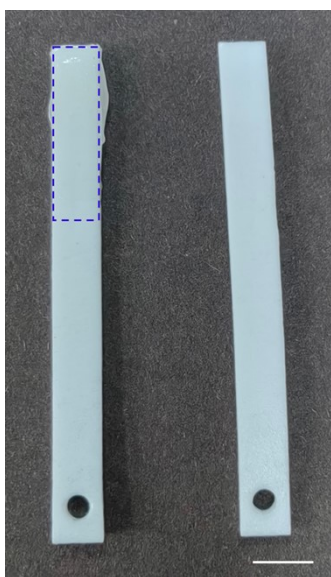

**Fig. S4** The distribution image of USSP<sub>400</sub> adhesive on PTFE substrate after detachment (scale bar, 1 cm).

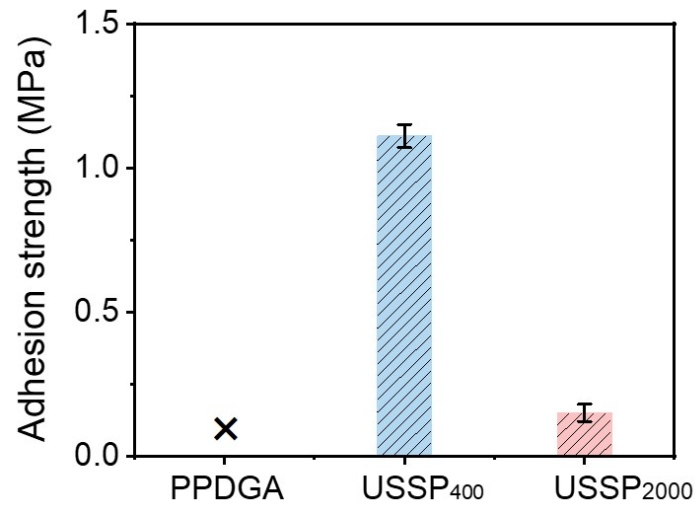

**Fig. S5** Adhesion strengths of PPDGA, USSP<sub>400</sub>, USSP<sub>2000</sub> adhesives on SS substrates.

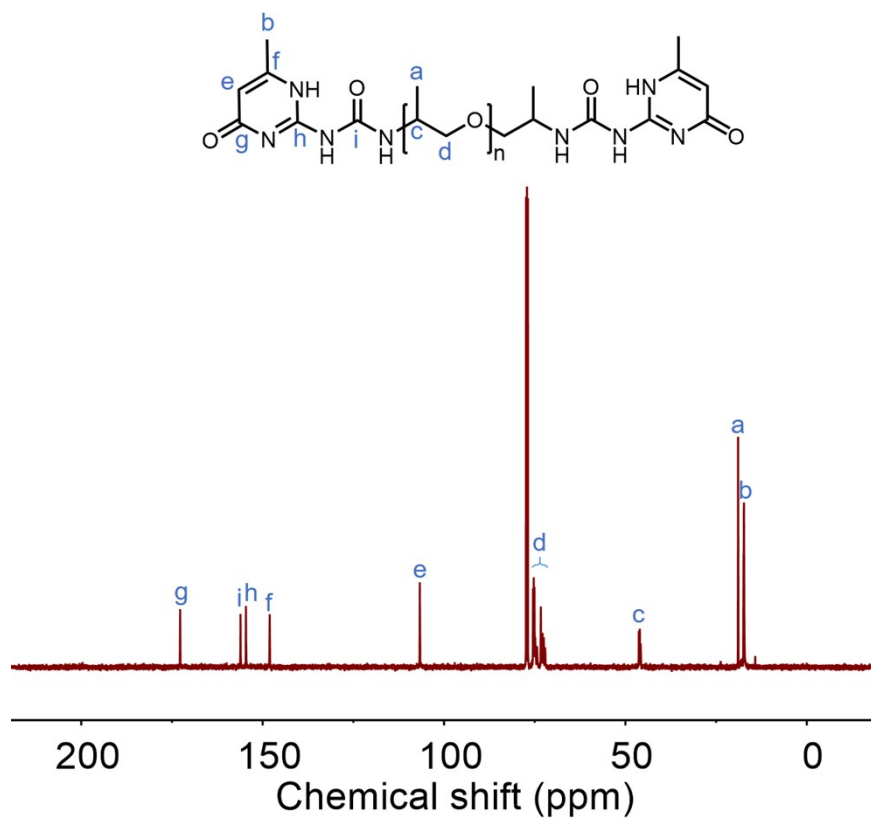

**Fig. S6** <sup>13</sup>C NMR spectra of USSP<sub>230</sub> in CDCl<sub>3</sub> (500 MHz, CDCl<sub>3</sub>, 0.1 mg/ml).

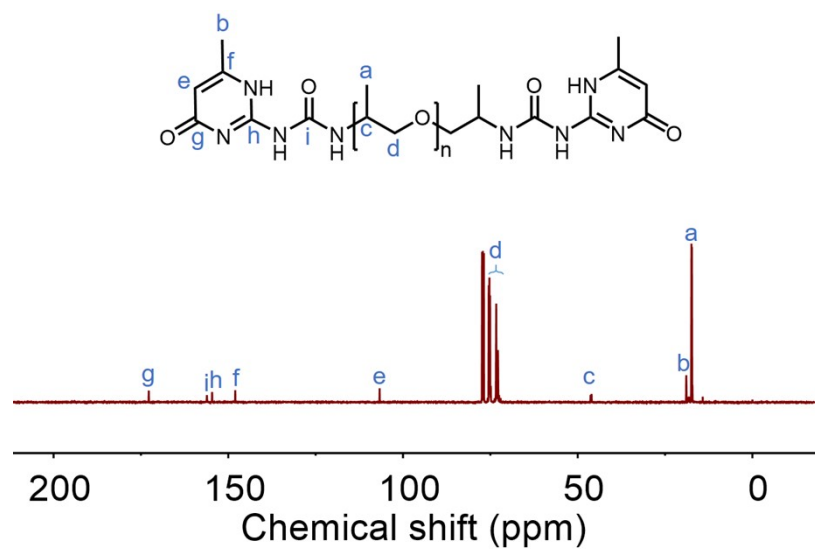

**Fig. S7** <sup>13</sup>C NMR spectra of USSP<sub>2000</sub> in CDCl<sub>3</sub> (500 MHz, CDCl<sub>3</sub>, 0.1 mg/ml).

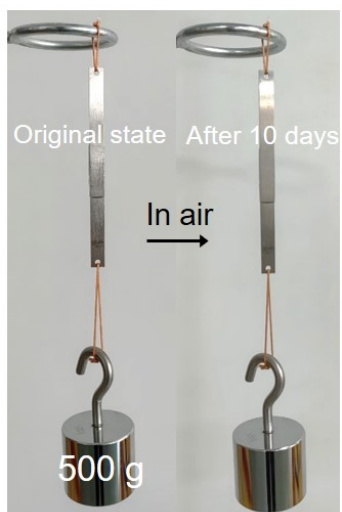

**Fig. S8** Photograph of the USSP<sub>400</sub> adhesive in air for 10 days.

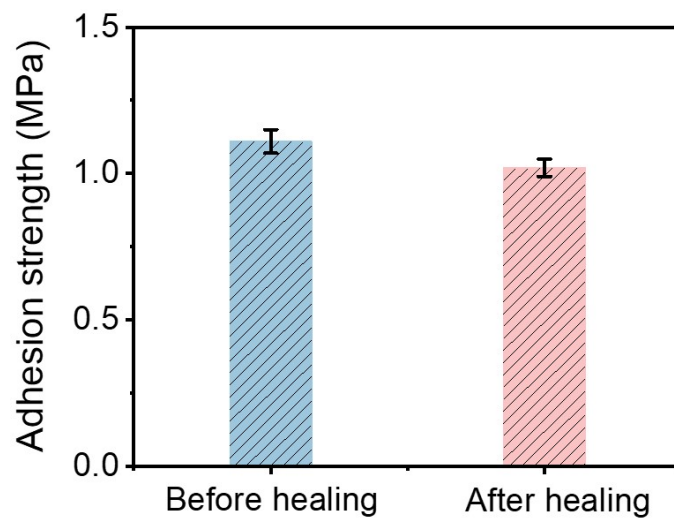

**Fig. S9** Adhesion strength of USSP<sub>400</sub> adhesive on SS substrates before and after healing.

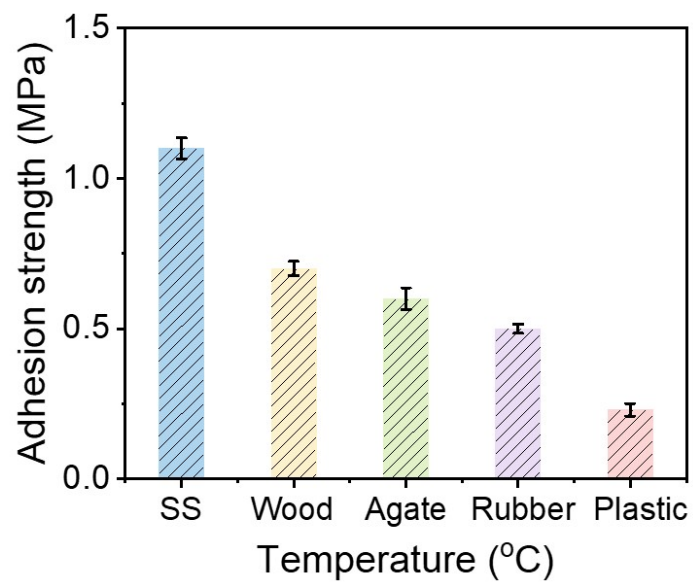

**Fig. S10** Adhesion strength of USSP<sub>400</sub> adhesive on various substrates.

**Table S1.** Performance comparison of the representative single-component or solvent-free adhesives.

| Sample                 | Composition | Type             | Adhesion strength (kPa) | Temperature (°C) | Reusability | Flexibility | Moldability | Self-healing | Ref.      |
|------------------------|-------------|------------------|-------------------------|------------------|-------------|-------------|-------------|--------------|-----------|
| USSP <sub>400</sub>    | Single      | Solvent-free     | 500<br>1100             | -40<br>60        | 15          | YES         | YES         | YES          | This work |
| EP-1-BMZ               | Single      | Solvent-assisted | 10620                   | RT               | N/A         | N/A         | N/A         | N/A          | 1         |
| BTA-C7                 | Single      | Solvent-assisted | 5180                    | RT               | N/A         | N/A         | N/A         | N/A          | 2         |
| PSFA                   | Single      | Solvent-free     | 2250                    | RT               | 2           | N/A         | N/A         | N/A          | 3         |
| PIL-2O-TFSI            | Single      | Solvent-free     | 1650                    | RT               | N/A         | YES         | N/A         | YES          | 4         |
| AZO-P1                 | Single      | Solvent-free     | 1340                    | RT<br>50         | 7           | N/A         | N/A         | N/A          | 5         |
| PCAVTri-TFS            | Single      | Solvent-assisted | 1230                    | RT               | N/A         | YES         | N/A         | N/A          | 6         |
| HA-3APBA               | Single      | Solvent-assisted | 65.7                    | RT               | 15          | YES         | N/A         | YES          | 7         |
| DESPs                  | Dual        | Solvent-free     | 6570<br>1300            | -80<br>80        | N/A         | N/A         | N/A         | N/A          | 8         |
| Poly(TtA DO-TA)-2      | Dual        | Solvent-free     | 4550                    | RT               | 10          | N/A         | N/A         | YES          | 9         |
| SSFP                   | Dual        | Solvent-free     | 2741<br>3736            | -196<br>RT       | 8           | N/A         | N/A         | N/A          | 10        |
| DPETI                  | Multiple    | Solvent-free     | 1840<br>2200            | -196<br>RT       | 10          | N/A         | N/A         | YES          | 11        |
| PNSA                   | Dual        | Solvent-free     | 850<br>1840             | -196<br>80       | 10          | N/A         | N/A         | N/A          | 12        |
| CA/PEG <sub>2000</sub> | Dual        | Solvent-free     | 850<br>530              | -196<br>RT       | 10          | N/A         | N/A         | N/A          | 13        |
| TADP30                 | Dual        | Solvent-free     | 360                     | 25<br>50         | 10          | N/A         | N/A         | YES          | 14        |
| P-PA55-PW30            | Multiple    | Solvent-free     | 210                     | 25               | N/A         | N/A         | N/A         | YES          | 15        |
| LTFe                   | Multiple    | Solvent-free     | 20                      | 25<br>-196       | 100         | YES         | YES         | YES          | 16        |

## References

1. Y. Zhao, Z. Pan, X. Han, et al. Preparation of low-temperature curing single-component epoxy adhesives with sedimentation coated accelerators. *J. Appl. Polym. Sci.* 2024, 141, e56165.
2. Y. Shao, W. Li, M. Cametti, et al. Single-component high-performance adhesives enabled by synergistic supramolecular and covalent polymerization. *J. Am. Chem. Soc.* 2025, 147, 23868–23877.
3. L. Liu, W. Ming, H. Li, et al. Polyvinyl alcohol solvent-free adhesives for biomass bonding via rapid water activation and heat treatment. *Green Chem.* 2024, 26, 11873–11884.
4. L. Wang, J. Li, M. Zong, Stretchable, adhesive, self-healing, high-efficiency microwave absorption by a gel-like single-component poly(ionic liquid). *Small Methods* 2025, 9, 2500335.
5. Z. Wu, C. Ji, X. Zhao, et al. Green-light-triggered phase transition of azobenzene derivatives toward reversible adhesives. *J. Am. Chem. Soc.* 2019, 141, 7385-7390.
6. B. Wang, C. Qiao, Y. Wang, et al. Multifunctional underwater adhesive film enabled by a single-component poly(ionic liquid). *ACS Nano* 2023, 17, 5871–5879.
7. M. Li, X. Shi, B. Yang, et al. Single-component hyaluronic acid hydrogel adhesive based on phenylboronic ester bonds for hemostasis and wound closure. *Carbohydr. Polym.* 2022, 296, 119953.
8. S. Wu, C. Cai, F. Li, et al. Deep eutectic supramolecular polymers: new type of bulk supramolecular materials. *Angew. Chem. Int. Ed.* 2020, 59, 11871-11875.
9. S. Yang, J. Bai, X. Sun, et al. Robust and healable poly(disulfides) supramolecular adhesives enabled by dynamic covalent adaptable networks and noncovalent hydrogen-bonding interactions. *Chem. Eng. J.* 2023, 461, 142066.
10. X. Xie, Y. Jiang, X. Yao, et al. A solvent-free processed low-temperature tolerant adhesive. *Nat. Commun.* 2024, 15, 5017.
11. H. Chen, X. Liu, Q. He, et al. Upcycling waste thermosetting polyimide resins into high-performance and sustainable low-temperature-resistance adhesives. *Adv. Mater.* 2024, 36, 2310779.
12. X. Xie, J. Liu, Z. Ma, et al. Preparation and characterization of solvent-free adhesive based on phenylalanine, *Chin. J. Appl. Chem.* 2025, 42, 1489-1499.
13. X. Xie, X. Xu, Y. Jiang, Hydrogen-bonding interaction-driven catechin assembly into solvent-free supramolecular adhesive with antidrying and antifreezing properties. *ACS Appl. Polym. Mater.* 2022, 4, 4319-4328.
14. J. Chen, D. Guo, S. Liang, et al. A supramolecular copolymer based on small molecules, used for a multifunctional adhesive and rapid hemostasis. *Polym. Chem.* 2020, 11, 6670-6680.
15. H. Guo, L. Li, X. Xu, et al. Semi-solid superprotonic supramolecular polymer electrolytes based on deep eutectic solvents and polyoxometalates. *Angew. Chem. Int. Ed.* 2022, 61, e202210695.
16. X. Ke, S. Tanga, Z. Dong, et al. An instant, repeatable and universal supramolecular adhesive based on natural small molecules for dry/wet environments. *Chem. Eng. J.* 2022, 442, 136206.
